# Supplementary material
Source: PubMed Central journal article supplement (PMC4834383)
Supplement: hdy2015110x1.pdf [file hdy2015110x1.pdf]

## Supplementary Information

“The fate of W chromosomes in hybrids between wild silkmoths, *Samia cynthia* ssp.: no role in sex determination and reproduction”

Atsuo Yoshido, Frantisek Marec, Ken Sahara

Supplementary Table S1

Supplementary Table S2

Supplementary Table S3

Supplementary Table S4

Supplementary Figure S1

Supplementary Figure S2

Supplementary Figure S3

Supplementary Figure S4

**Supplementary Table S1** Hatchability of eggs in the control (C), parental (P) and F<sub>1</sub> crosses, and backcrosses (B<sub>1</sub>) between *Samia cynthia walkeri* (SCW) and *Samia cynthia pryeri* (SCP)

| Cross No. | Cross type     | Crosses     |             | No. of pairs | No. of eggs laid mean ± SD <sup>#</sup> | Egg hatchability (%) mean ± SD <sup>#</sup> |
|-----------|----------------|-------------|-------------|--------------|-----------------------------------------|---------------------------------------------|
|           |                | female      | male        |              |                                         |                                             |
| 1         | C              | SCW         | SCW         | 4            | 243.3 ± 44.2a,b,c                       | 89.6 ± 7.1a,b                               |
| 2         | C              | SCP         | SCP         | 3            | 178.7 ± 39.6c                           | 80.1 ± 4.0b                                 |
| 3         | P              | SCP         | SCW         | 5            | 179.0 ± 72.9c                           | 96.1 ± 2.0a                                 |
| 4         | P              | SCW         | SCP         | 3            | 228.7 ± 11.9b,c                         | 94.1 ± 4.6a,b                               |
| 5         | B <sub>1</sub> | SCP♀ × SCW♂ | SCW         | 3            | 362.3 ± 65.7a,b                         | 8.8 ± 6.1e                                  |
| 6         | B <sub>1</sub> | SCW         | SCP♀ × SCW♂ | 5            | 345.8 ± 22.5a,b                         | 46.0 ± 6.7c                                 |
| 7         | B <sub>1</sub> | SCW♀ × SCP♂ | SCW         | 3            | 232.7 ± 46.0a,b,c                       | 50.1 ± 4.9c                                 |
| 8         | B <sub>1</sub> | SCW         | SCW♀ × SCP♂ | 3            | 185.3 ± 88.7c                           | 40.4 ± 4.9c,d                               |
| 9         | F <sub>1</sub> | SCP♀ × SCW♂ | SCP♀ × SCW♂ | 6            | 351.3 ± 38.8a                           | 12.5 ± 4.9e                                 |
| 10        | F <sub>1</sub> | SCW♀ × SCP♂ | SCW♀ × SCP♂ | 6            | 218.3 ± 47.7c                           | 30.5 ± 7.5d                                 |

<sup>#</sup>Compared using one-way ANOVA followed by Tukey's multiple comparisons test; values in columns marked with the same letters are not significantly different ( $P > 0.05$ ).

**Supplementary Table S2** Sex chromosome constitutions in respective F<sub>2</sub> hybrid individuals produced by reciprocal crosses between *Samia cynthia* ssp.

| Crosses: SCP♀ × SCW♂ |                 |                   | Crosses: SCW♀ × SCP♂ |                 |                   |
|----------------------|-----------------|-------------------|----------------------|-----------------|-------------------|
| F <sub>2</sub> larva | Sex chromosomes | Type <sup>a</sup> | F <sub>2</sub> larva | Sex chromosomes | Type <sup>b</sup> |
| Male 1               | neo-Z/Z/Chr13   | expected g)       | Male 1               | Z/Z/Chr13/neo-W | unexpected l)     |
| Male 2               | neo-Z/Z/Chr13/W | unexpected k)     | Male 2               | Z/neo-Z/neo-W   | unexpected k)     |
| Male 3               | neo-Z/Z/Chr13   | expected g)       | Male 3               | Z/Z/Chr13/Chr13 | expected h)       |
| Male 4               | neo-Z/neo-Z/W   | unexpected l)     | Male 4               | Z/neo-Z/Chr13   | expected g)       |
| Male 5               | neo-Z/neo-Z/W   | unexpected l)     | Male 5               | Z/Z/Chr13/Chr13 | expected h)       |
| Male 6               | neo-Z/neo-Z/W   | unexpected l)     | Male 6               | Z/neo-Z/Chr13   | expected g)       |
| Male 7               | neo-Z/neo-Z     | expected h)       | Male 7               | Z/Z/Chr13/neo-W | unexpected l)     |
| Male 8               | neo-Z/Z/Chr13   | expected g)       | Male 8               | Z/Z/Chr13/neo-W | unexpected l)     |
| Female 1             | neo-Z/Chr13/W   | expected e)       | Female 1             | neo-Z/neo-W     | expected e)       |
| Female 2             | neo-Z/Chr13     | unexpected i)     | Female 2             | neo-Z/neo-W     | expected e)       |
| Female 3             | Z/Chr13/Chr13   | unexpected j)     | Female 3             | Z/Chr13/Chr13   | unexpected j)     |
| Female 4             | Z/Chr13/Chr13/W | expected f)       | Female 4             | Z/Chr13/Chr13   | unexpected j)     |
| Female 5             | neo-Z/Chr13/W   | expected e)       | Female 5             | Z/Chr13/neo-W   | expected f)       |
| Female 6             | Z/Chr13/Chr13   | unexpected j)     | Female 6             | neo-Z/Chr13     | unexpected i)     |
| Female 7             | neo-Z/Chr13     | unexpected i)     | Female 7             | Z/Chr13/neo-W   | expected f)       |
| Female 8             | Z/Chr13/Chr13/W | expected f)       | Female 8             | neo-Z/neo-W     | expected e)       |

<sup>a</sup>Symbols e) to l) indicate the types of sex chromosome constitutions in Figure 3e-l.

<sup>b</sup>Symbols e) to l) indicate the types of sex chromosome constitutions in Figure 4e-l.

**Supplementary Table S3** GenBank accession numbers of repetitive sequences derived from the *Samia cynthia pryeri* W chromosome and *GRP2* sequences of two *S. cynthia* subspecies (*walkeri* and *pryeri*) used in this study

| Species              | Symbol                  | Chromosome       | Accession No. |
|----------------------|-------------------------|------------------|---------------|
| <i>S. c. pryeri</i>  | minor W-repeat (SCPW67) | W chromosome     | LC033565      |
| <i>S. c. pryeri</i>  | major W-repeat (SCPW50) | W chromosome     | LC033564      |
| <i>S. c. pryeri</i>  | <i>GRP2</i>             | Chromosome 13    | LC033563      |
| <i>S. c. walkeri</i> | <i>GRP2</i>             | neo-Z chromosome | LC033562      |
| <i>S. c. walkeri</i> | <i>GRP2</i>             | neo-W chromosome | LC033561      |

**Supplementary Table S4** Hatchability of eggs and W (neo-W) chromosome genotype of parents in individual crosses between F<sub>2</sub> hybrids (data used in scatterplots presented in Figure 5)

| Crosses between F <sub>2</sub> hybrids (SCP♀ × SCW♂) |                  |                           |      | Crosses between F <sub>2</sub> hybrids (SCW♀ × SCP♂) |                  |                               |      |
|------------------------------------------------------|------------------|---------------------------|------|------------------------------------------------------|------------------|-------------------------------|------|
| Pair                                                 |                  | W chromosome <sup>#</sup> |      | Pair                                                 |                  | neo-W chromosome <sup>#</sup> |      |
| No.                                                  | Egg hatchability | female                    | male | No.                                                  | Egg hatchability | female                        | male |
| 1                                                    | 0.4461           | +                         | -    | 1                                                    | 0.3691           | -                             | +    |
| 2                                                    | 0.4088           | -                         | -    | 2                                                    | 0.0192           | +                             | -    |
| 3                                                    | 0.0776           | -                         | +    | 3                                                    | 0.0000           | +                             | +    |
| 4                                                    | 0.2628           | +                         | +    | 4                                                    | 0.0047           | +                             | -    |
| 5                                                    | 0.2690           | -                         | -    | 5                                                    | 0.3624           | -                             | -    |
| 6                                                    | 0.2336           | -                         | +    | 6                                                    | 0.1554           | +                             | -    |
| 7                                                    | 0.0000           | +                         | -    | 7                                                    | 0.0101           | +                             | -    |
| 8                                                    | 0.4548           | +                         | +    | 8                                                    | 0.0046           | +                             | -    |
| 9                                                    | 0.0000           | -                         | +    | 9                                                    | 0.0000           | +                             | -    |
| 10                                                   | 0.2148           | -                         | +    | 10                                                   | 0.0000           | -                             | +    |
| 11                                                   | 0.0610           | +                         | -    | 11                                                   | 0.0971           | +                             | +    |
| 12                                                   | 0.0000           | +                         | +    | 12                                                   | 0.1370           | -                             | +    |
| 13                                                   | 0.3599           | +                         | -    |                                                      |                  |                               |      |
| 14                                                   | 0.1557           | -                         | -    |                                                      |                  |                               |      |
| 15                                                   | 0.0588           | -                         | +    |                                                      |                  |                               |      |
| 16                                                   | 0.0000           | +                         | -    |                                                      |                  |                               |      |
| 17                                                   | 0.7500           | +                         | -    |                                                      |                  |                               |      |
| 18                                                   | 0.0000           | +                         | +    |                                                      |                  |                               |      |
| 19                                                   | 0.3750           | +                         | +    |                                                      |                  |                               |      |
| 20                                                   | 0.0000           | -                         | +    |                                                      |                  |                               |      |
| 21                                                   | 0.0000           | +                         | -    |                                                      |                  |                               |      |

<sup>#</sup>The presence (+) or absence (-) of W (or neo-W) chromosome in respective F<sub>2</sub> hybrids.

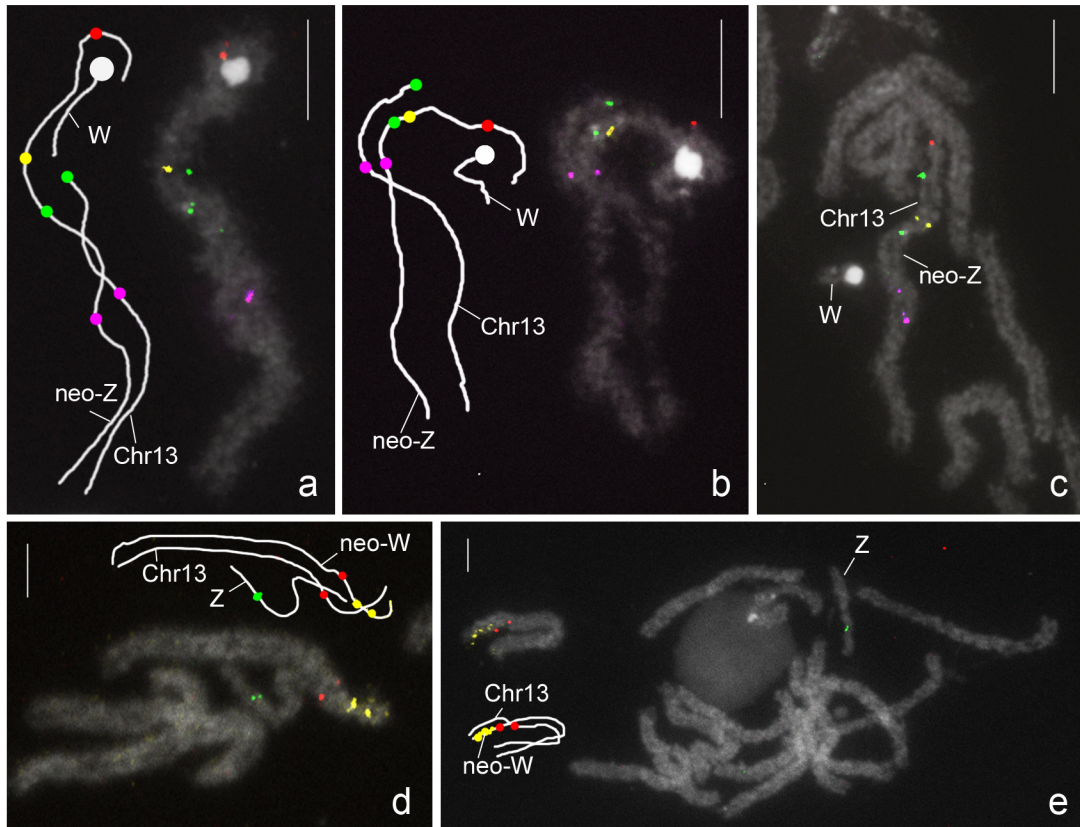

**Supplementary Figure S1** FISH with sex chromosome derived probes in pachytene chromosomes of  $F_1$  females from crosses between *Samia cynthia pryeri* females and *S. c. walkeri* males (**a-c**), and between *S. c. walkeri* females and *S. c. pryeri* males (**d-e**). Chromosomes were stained with DAPI (grey). (**a-c**) Orange-labelled probe of the 19B8 fosmid clone (yellow signals) and Red-labelled probe of the 45A6 fosmid clone (red signals) mapped to the ancestral part of the neo-Z chromosome, and Green-labelled probe of the 56J8 fosmid clone (green signals) and Cy5-labelled probe of the 56J22 fosmid clone (magenta signals) to chromosome 13 or the corresponding autosomal part of the neo-Z chromosome (for details about fosmid probes, see Yoshido *et al.*, 2013). The *S. c. pryeri* W chromosome is easily distinguished by strong DAPI staining. (**d-e**) Cy3-labelled probe of the 32B23 fosmid clone (red signals) mapped to chromosome 13 or the corresponding autosomal part of the neo-W chromosome, and Green-labelled probe of the 45A6 fosmid clone (green signals) to the Z chromosomes. Cy3-labelled W-painting probe (yellow signals) highlighted the ancestral part of the *S. c. walkeri* neo-W chromosomes. Bar = 5.0  $\mu\text{m}$ .

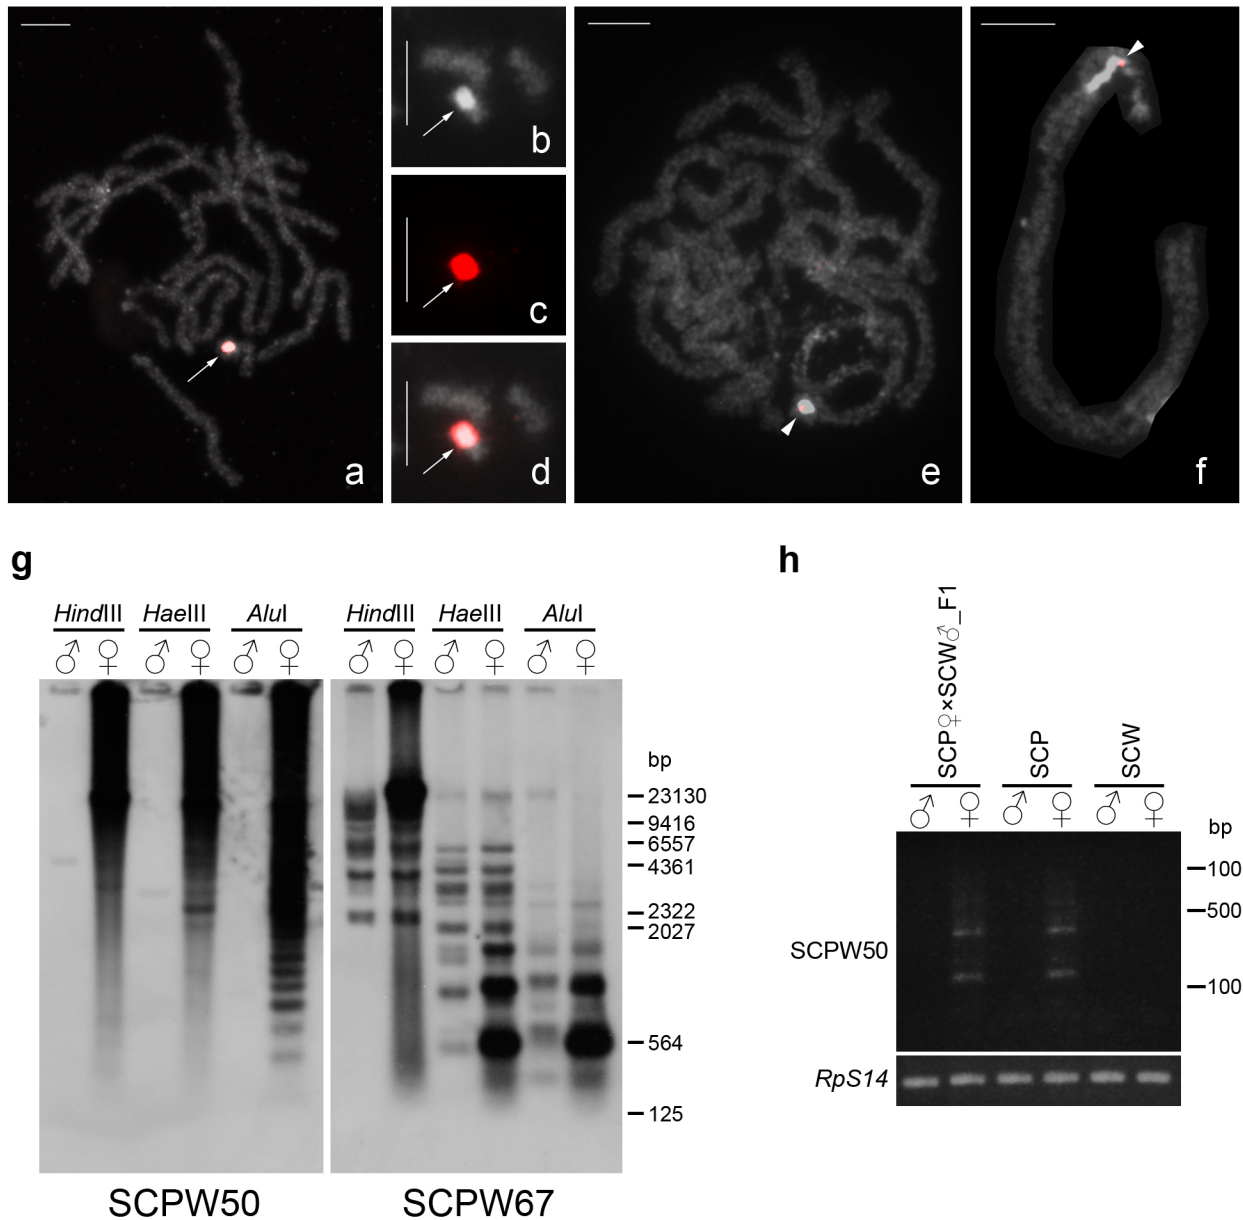

**Supplementary Figure S2** (a-f) FISH with Cy3-labelled probes of the SCPW50 (a-d) and SCPW67 (e-f) clones derived from the *Samia cynthia pryeri* W chromosome DNA sequences. Bar = 5.0  $\mu$ m. (a) The SCPW50 probe highlighted the W chromosome (arrow) in pachytene complement of *S. c. pryeri*. (b-d) A detail of the WZ bivalent: b DAPI image; c SCPW50 probe; d merged image. Arrows indicate the highly heterochromatic part of the W chromosome identified with the probe. (e) The SCPW67 probe hybridized to a small part of *S. c. pryeri* W chromosome (arrowhead) in pachytene complement of F<sub>1</sub> female of the cross between *S. c. pryeri* female and *S. c. walkeri* male. (f) A detail of a sex chromosome trivalent (W + neo-Z + chromosome 13) showing a discrete hybridization signal of the probe (arrowhead). In F<sub>1</sub> females, similar trivalents without the W ball-like structure were rarely observed (see Yoshido *et al.*, 2013). (g) Southern hybridization with the SCPW50 (left) and SCPW67 (right) probes. Genomic DNAs of *S. c. pryeri* were digested using three restriction enzymes, *HindIII*, *HaeIII*, and *AluI*, respectively. Size specification, done with  $\lambda$ -*HindIII* digest, is shown by numbers (bp) on the right-hand side. (h) Gel showing results of PCR using a primer set designed according to the SCPW50 sequence. Respective genomic DNAs extracted from both sexes of F<sub>1</sub> hybrids of crosses between *S. c. pryeri* female and *S. c. walkeri* male (SCP♀×SCW♂\_F1), *S. c. pryeri* (SCP) and *S. c. walkeri* (SCW) were used as templates. A partial sequence of the Ribosomal protein 14 (*RpS14*) gene was used as a positive control. 1000, 500, and 100 indicate molecular size markers (bp).

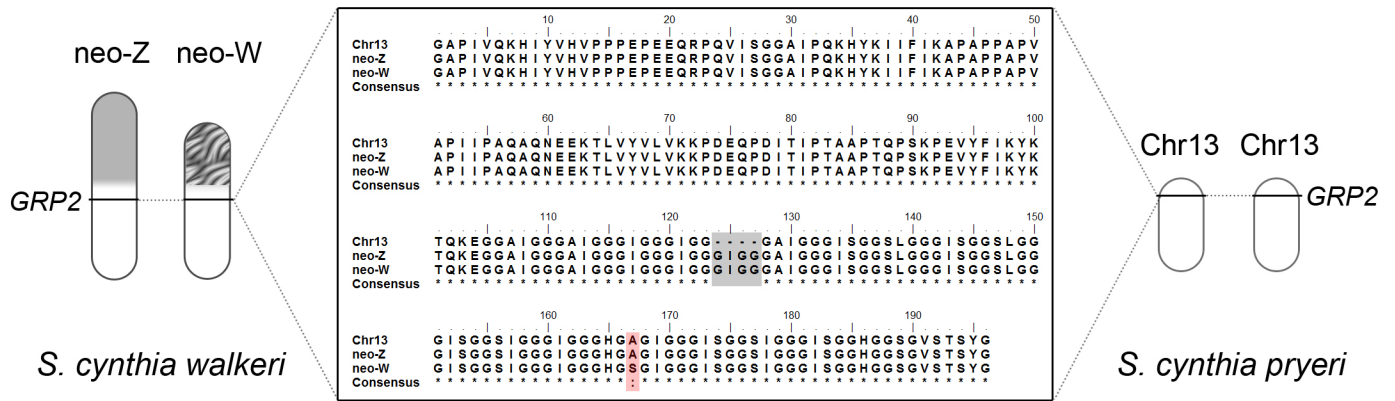

**Supplementary Figure S3** Comparison of glycin rich protein 2 (GRP2) amino acid sequences derived from a part of the orthologous sequences of the *GRP2* gene obtained from the neo-Z and neo-W chromosomes in *S. cynthia walkeri* and chromosome 13 in *S. cynthia pryeri*. The subspecies sequences differ by an insertion/deletion at positions 124-127 (grey boxed). A non-synonymous substitution was identified at the 167 position of GRP2 (red boxed) derived from the neo-W chromosome GRP2 sequence.



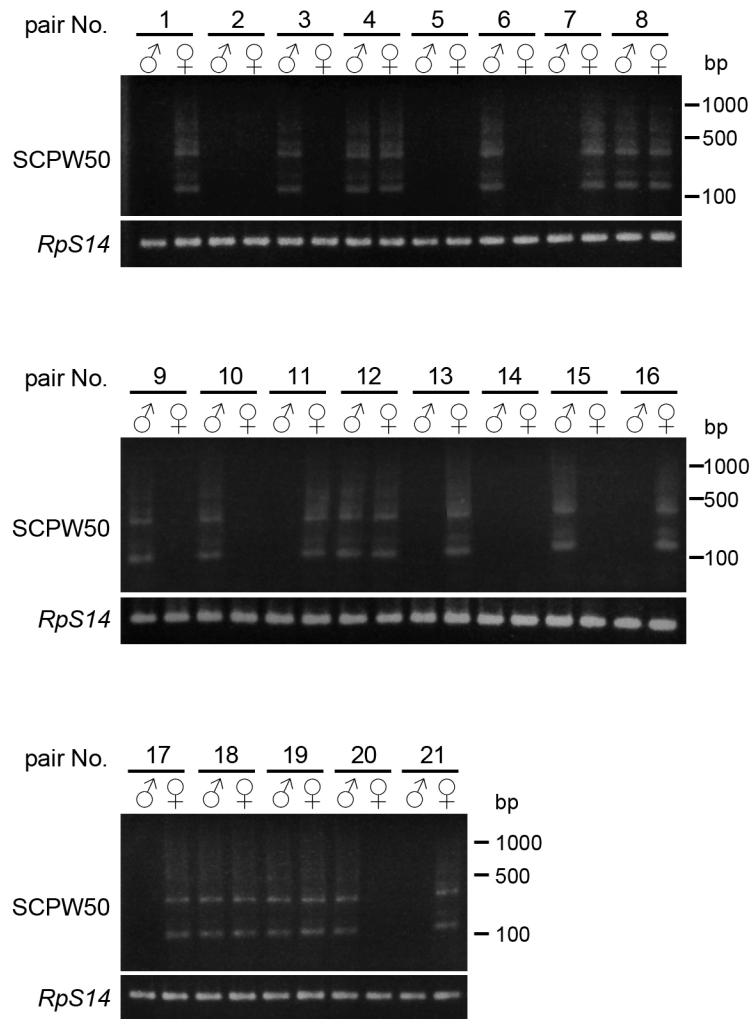

**Supplementary Figure S4** Gels showing PCR detection of the W chromosome marker in genomic DNAs of 21 pairs of F<sub>2</sub> hybrids from crosses between *Samia cynthia pryeri* females and *Samia cynthia walkeri* males using a primer set specific for the SCPW50 sequence. A partial sequence of the *Ribosomal protein 14* (*RpS14*) was used as a positive control. 1000, 500, and 100 indicate molecular size markers (bp).
